# Supplementary material
Source: PubMed Central journal article supplement (PMC5550283)
Supplement: NIHMS886166-supplement-supplement_1.pdf [file NIHMS886166-supplement-supplement_1.pdf]

**Supplemental Table 1. Cohorts Included in Analytic Sample and Years of Survey Participation**

| Age 18 Survey <sup>a</sup> | Age 19/20 Survey <sup>b</sup> | Age 21/22 Survey <sup>b</sup> | Age 23/24 Survey <sup>b</sup> | Age 25/26 Survey <sup>b</sup> |
|----------------------------|-------------------------------|-------------------------------|-------------------------------|-------------------------------|
| 2005                       | 2006 / 2007                   | 2008 / 2009                   | 2010 / 2011                   | 2012 / 2013                   |
| 2006                       | 2007 / 2008                   | 2009 / 2010                   | 2011 / 2012                   | 2013 / 2014                   |
| 2007                       | 2008 / 2009                   | 2010 / 2011                   | 2012 / 2013                   | 2014 / 2015                   |
| 2008                       | 2009 / 2010                   | 2011 / 2012                   | 2013 / 2014                   | 2015 / 2016                   |

<sup>a</sup>Year of participation in the 12<sup>th</sup> grade Monitoring the Future (MTF) survey.

<sup>b</sup>Year of participation in the noted modal age MTF follow-up survey. Respondents from each 12<sup>th</sup> grade high school cohort are randomly divided with half surveyed for longitudinal follow-up in odd-numbered years and half in even-numbered years. For example, half of the 2005 cohort was surveyed at age 25 in 2012, and half at age 26 in 2013.
